# Supplementary figures and images for: Telomere length sensitive regulation of interleukin receptor 1 type 1 (IL1R1) by the shelterin protein TRF2 modulates immune signalling in the tumour microenvironment
Source: eLife journal article supplement (doi:10.7554/elife.95106), 2024-03-01

Figure 1- figure supplement 2 I

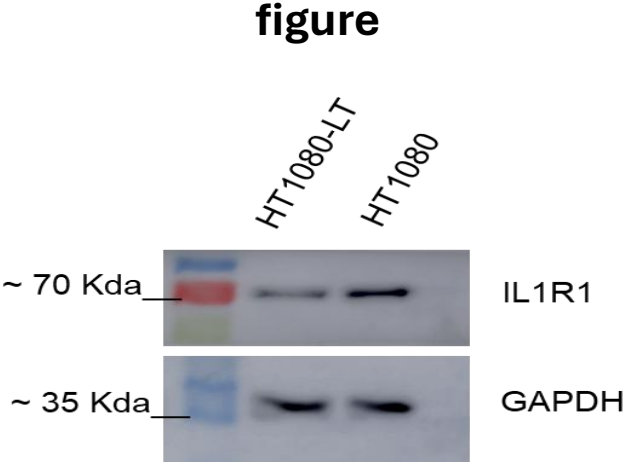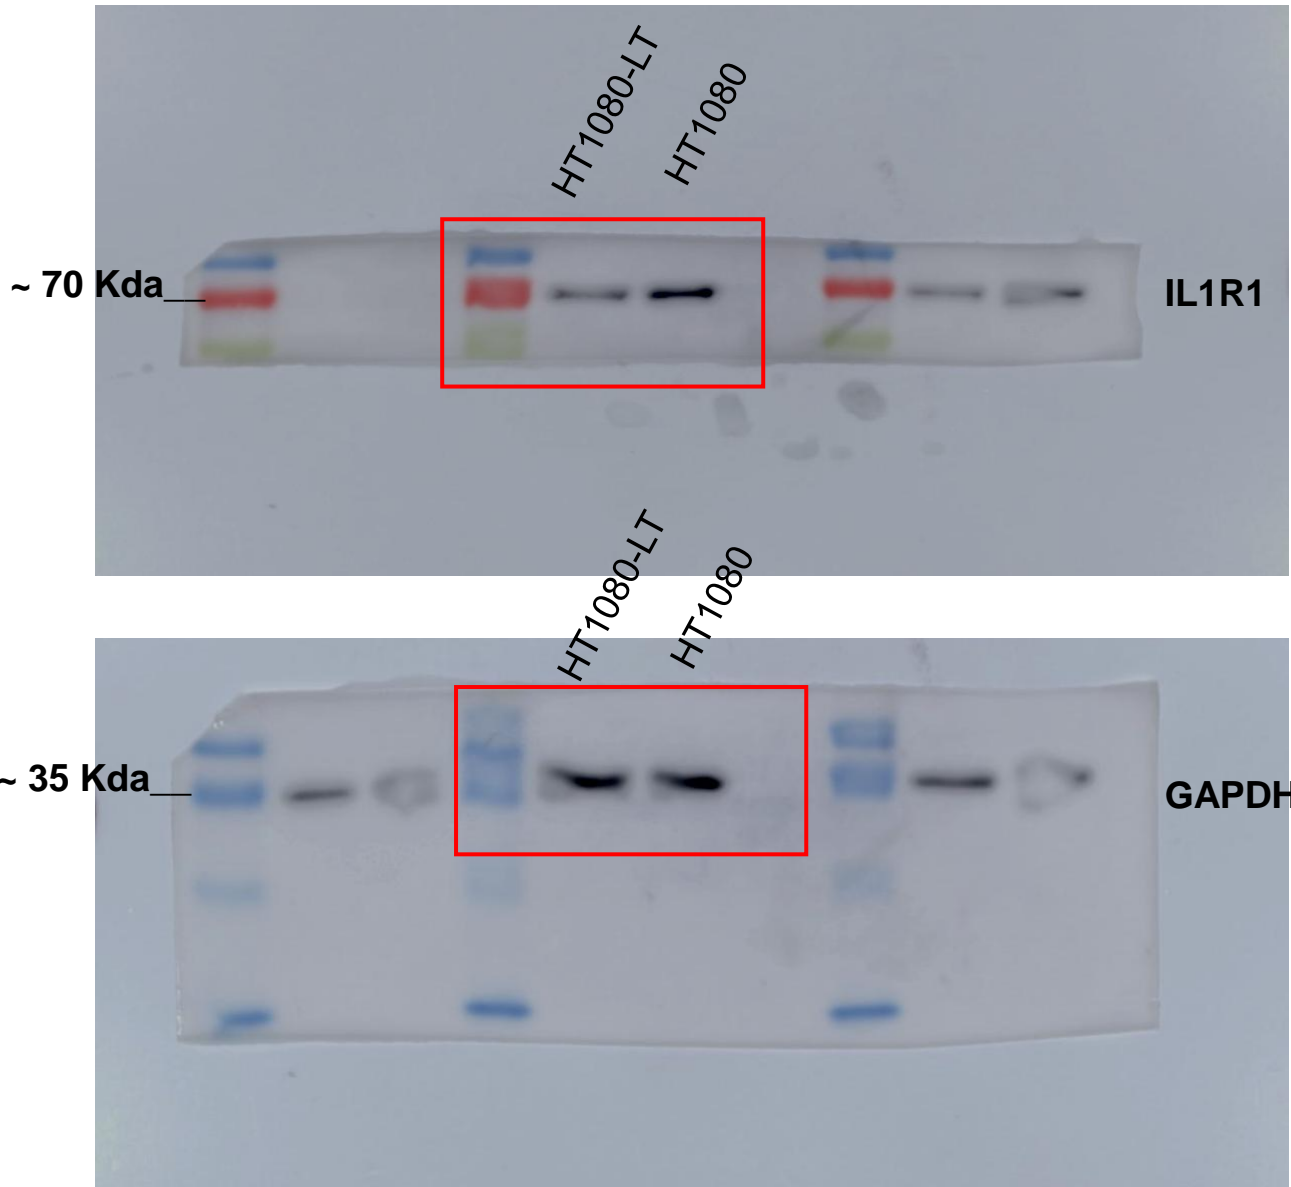

Supplement: fig1-figsupp2-data2 [file elife-95106-fig1-figsupp2-data2-v1.zip]

**Figure 2D**

**figure**

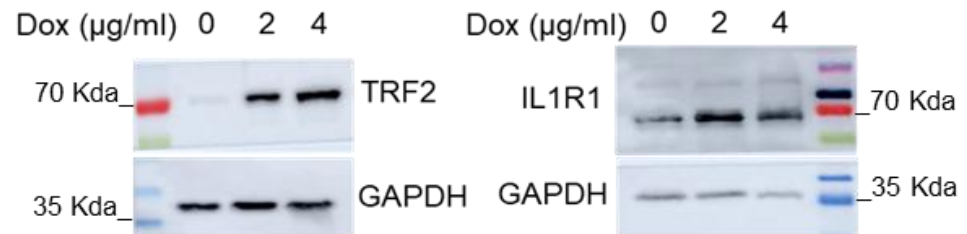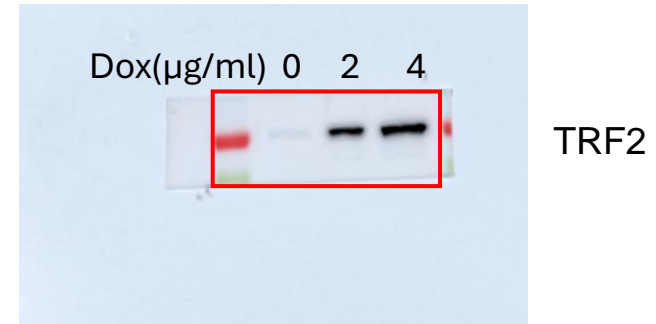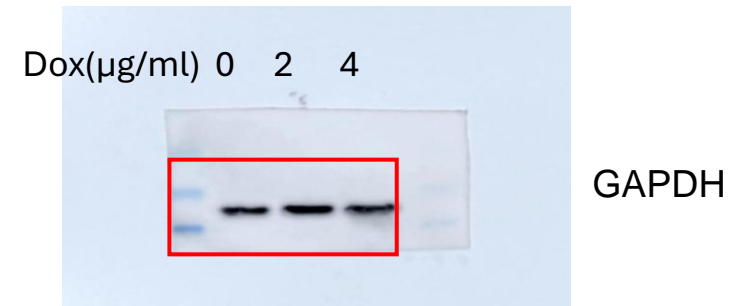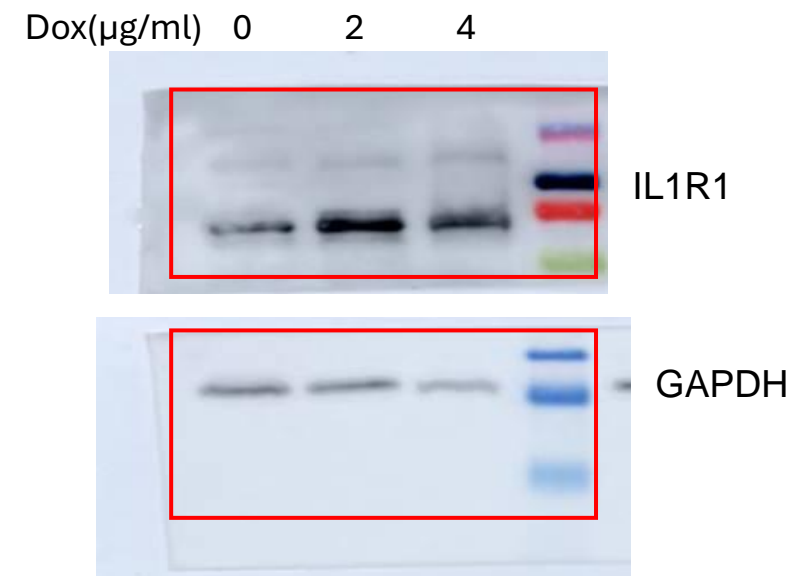

Supplement: fig2-data2 [file elife-95106-fig2-data2-v1.zip]

Figure 2 –figure supplement 1A

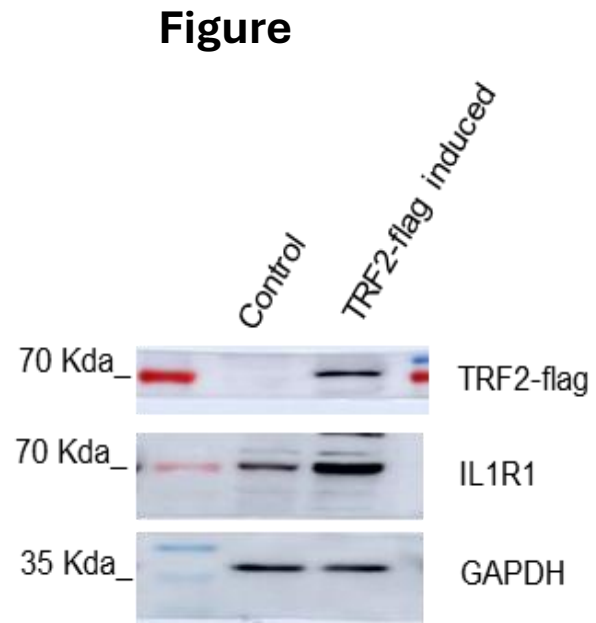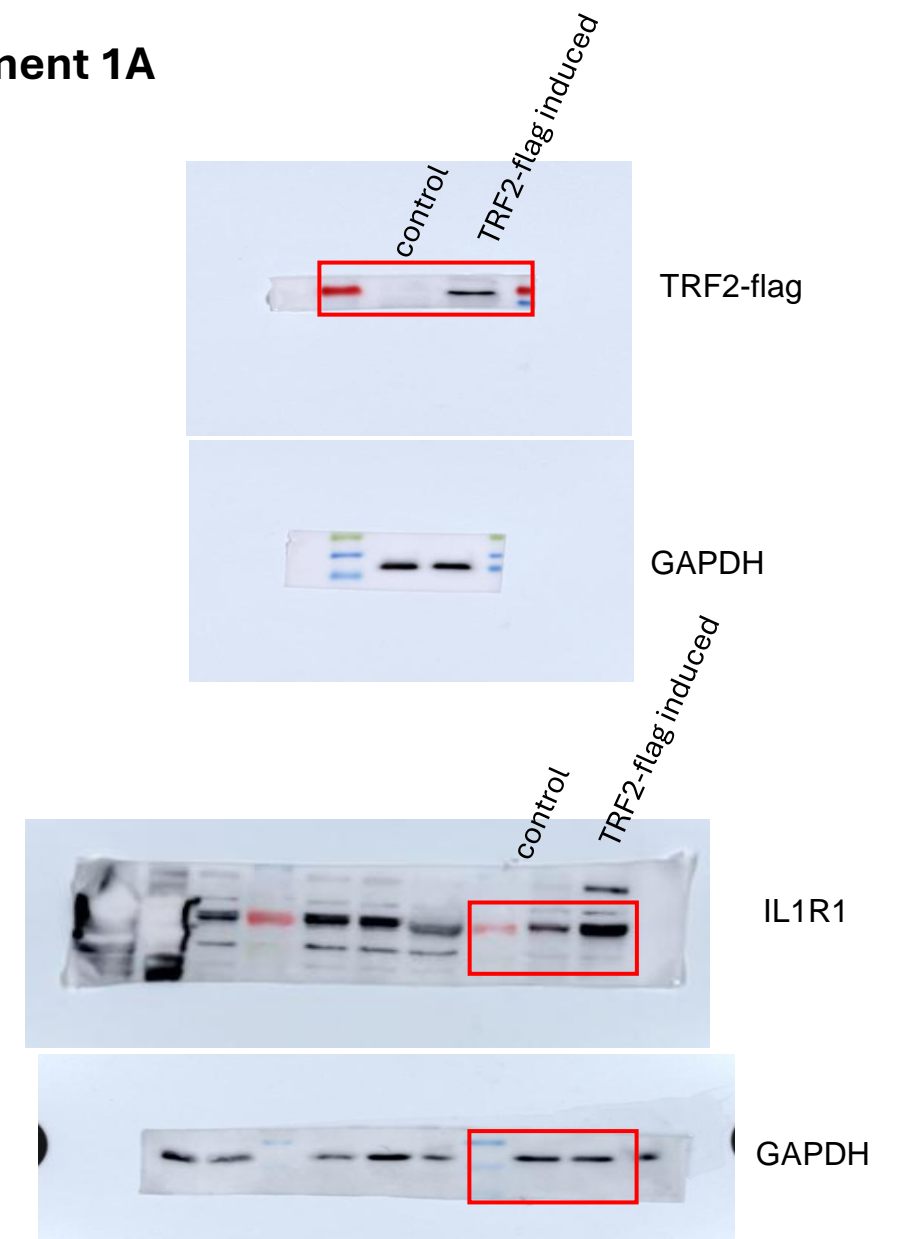

**Figure**

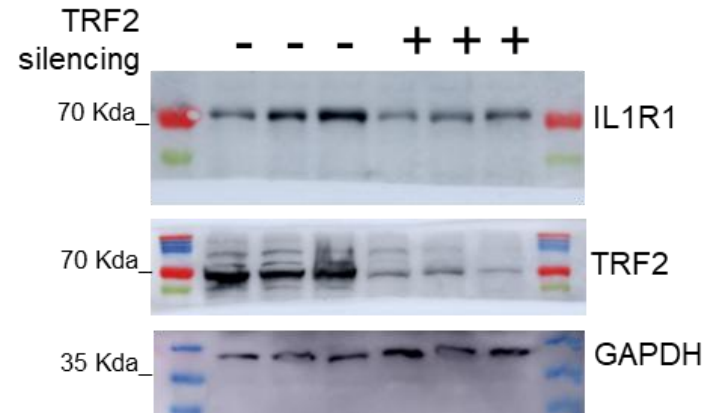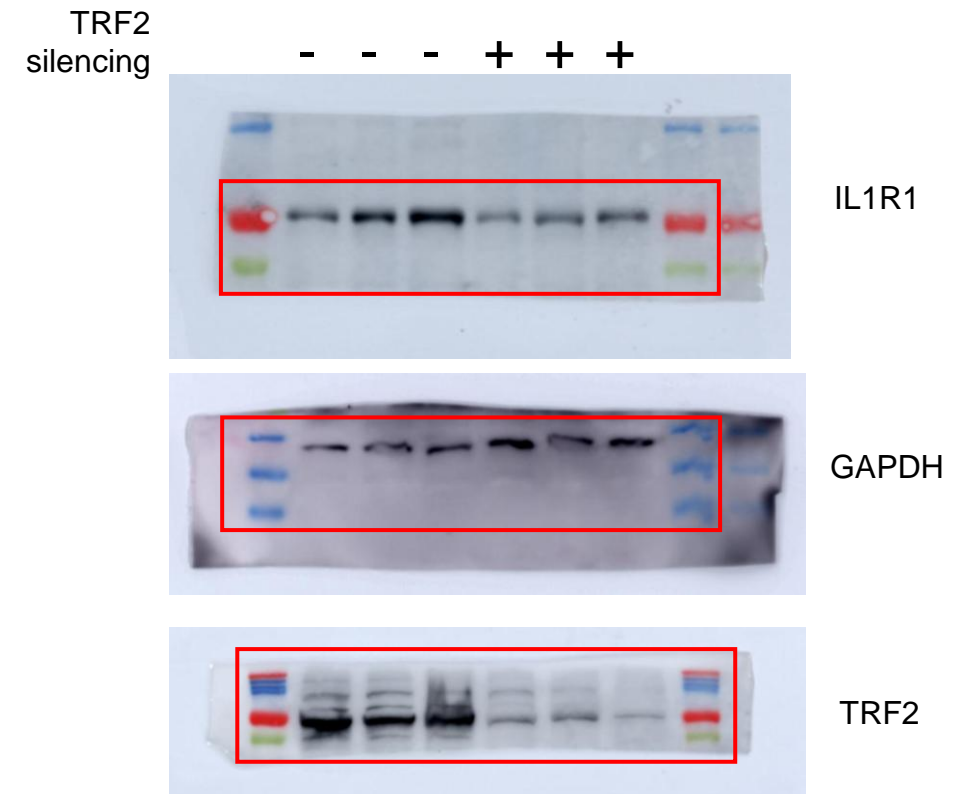

Figure 2 –figure supplement 1 B

Figure

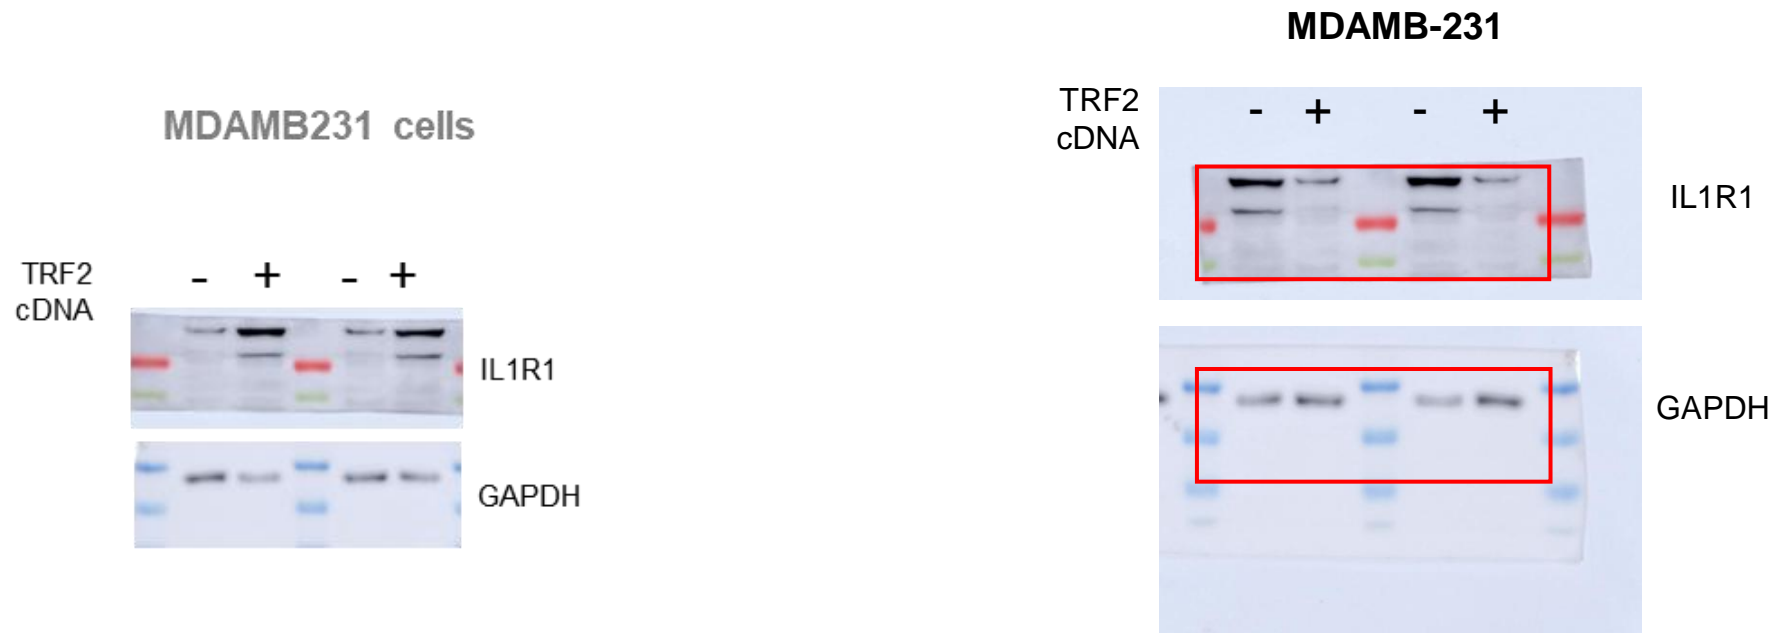

Supplement: fig2-figsupp1-data2 [file elife-95106-fig2-figsupp1-data2-v1.zip]

Figure 3 E

Figure

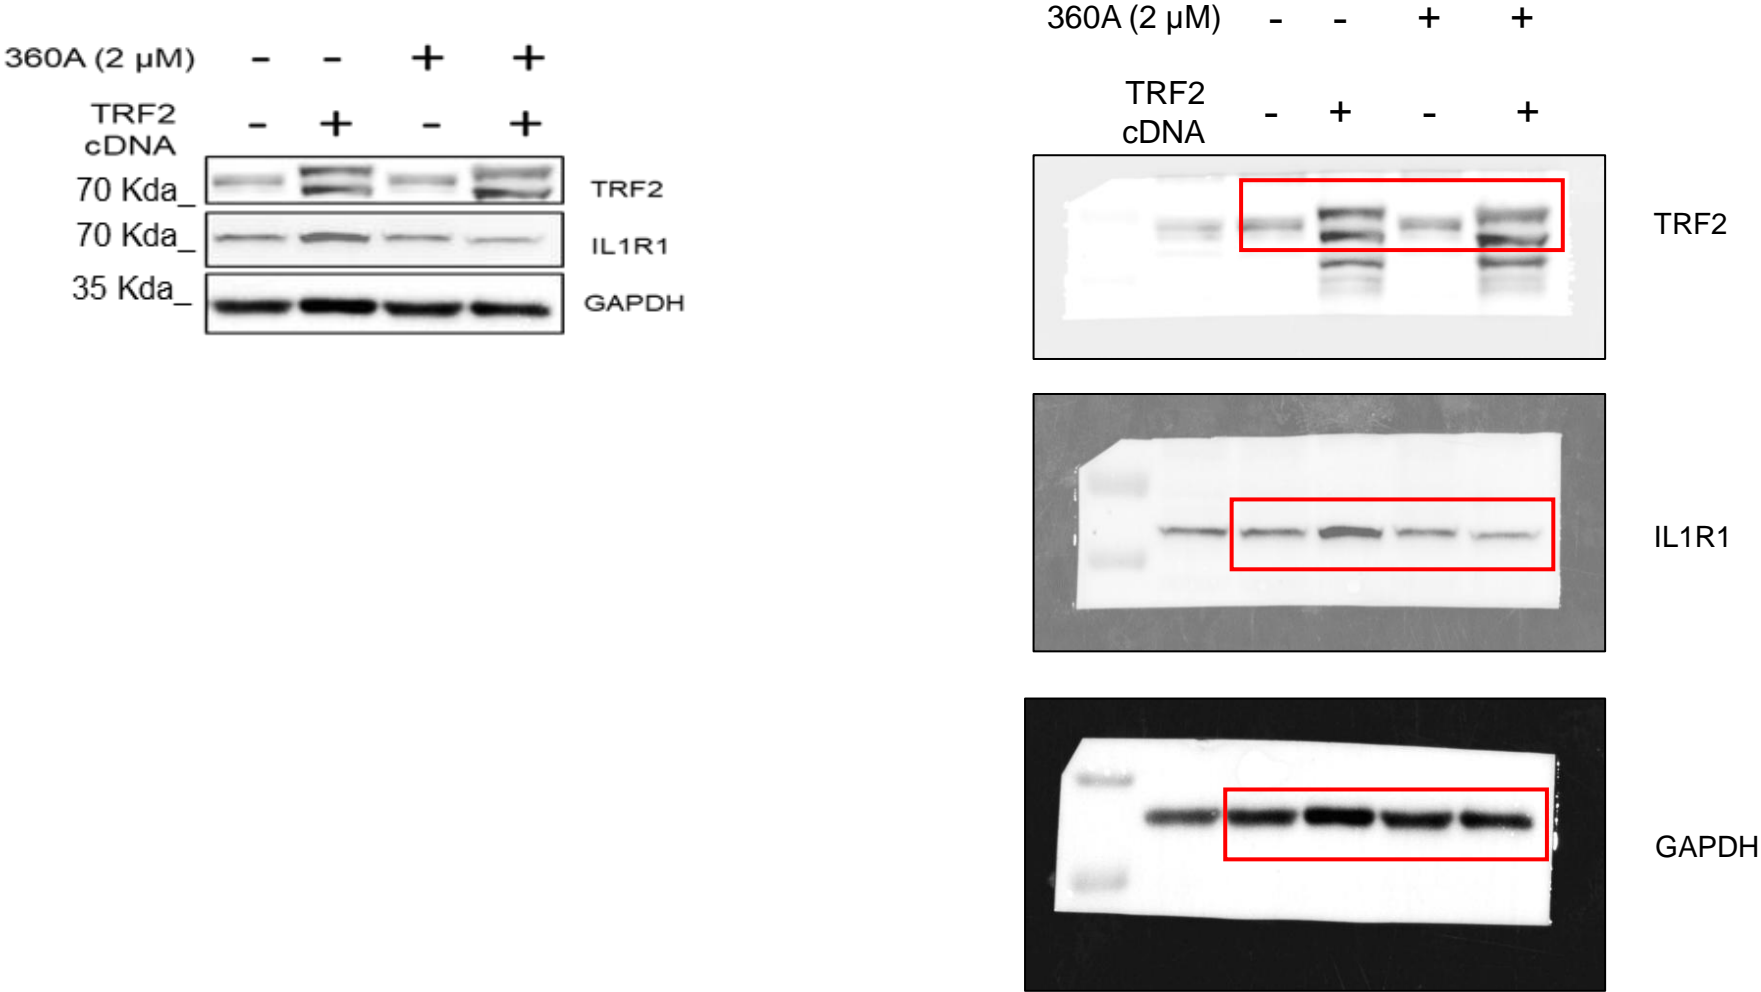

Supplement: fig3-data2 [file elife-95106-fig3-data2-v2.zip]

Figure 4-figure supplement 1C

Figure

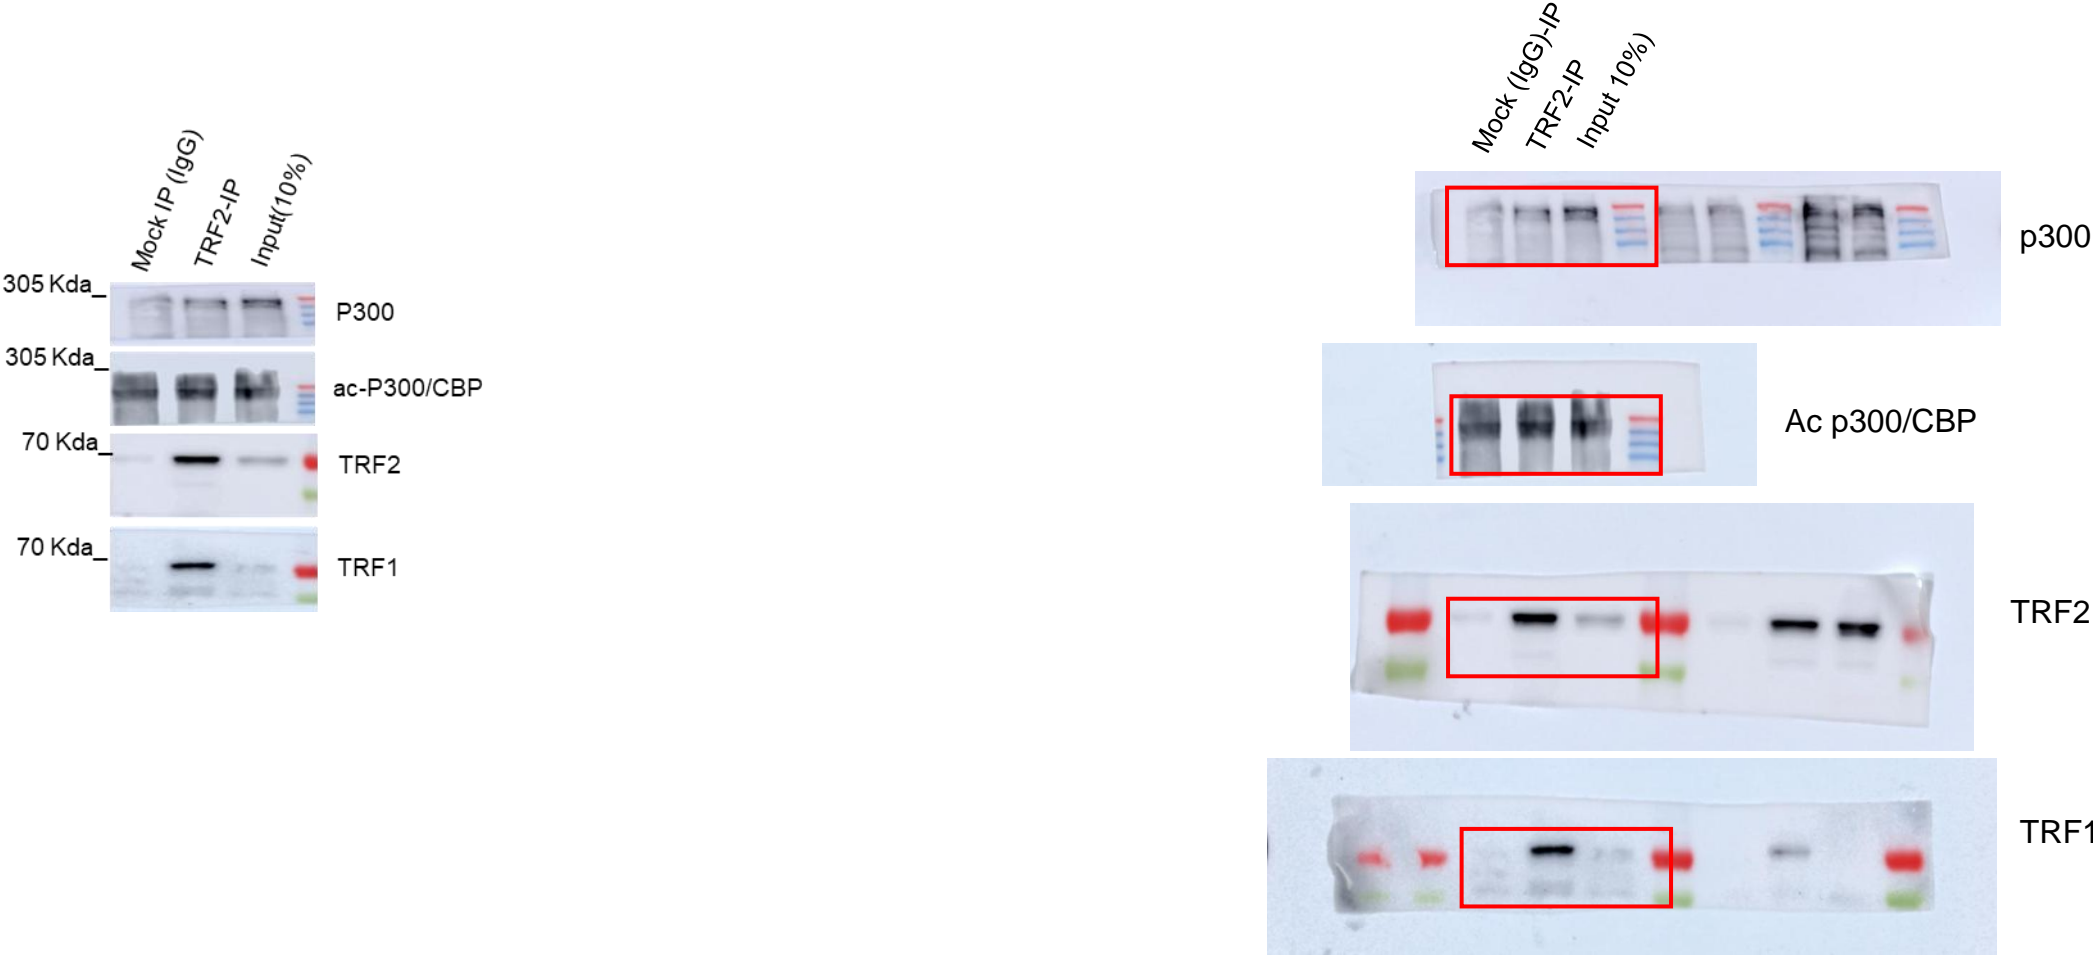

Supplement: fig4-figsupp1-data2 [file elife-95106-fig4-figsupp1-data2-v1.zip]

**Figure 5C**

**Figure**

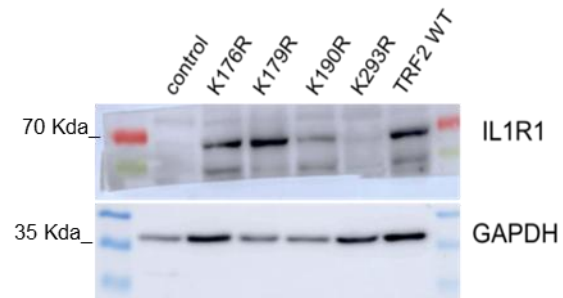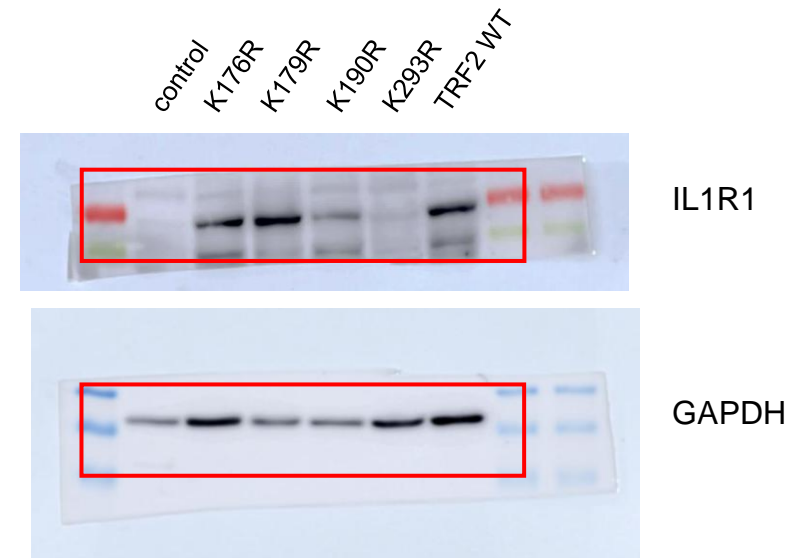

Supplement: fig5-data2 [file elife-95106-fig5-data2-v1.zip]

Figure 5-figure supplement 1 A

Figure

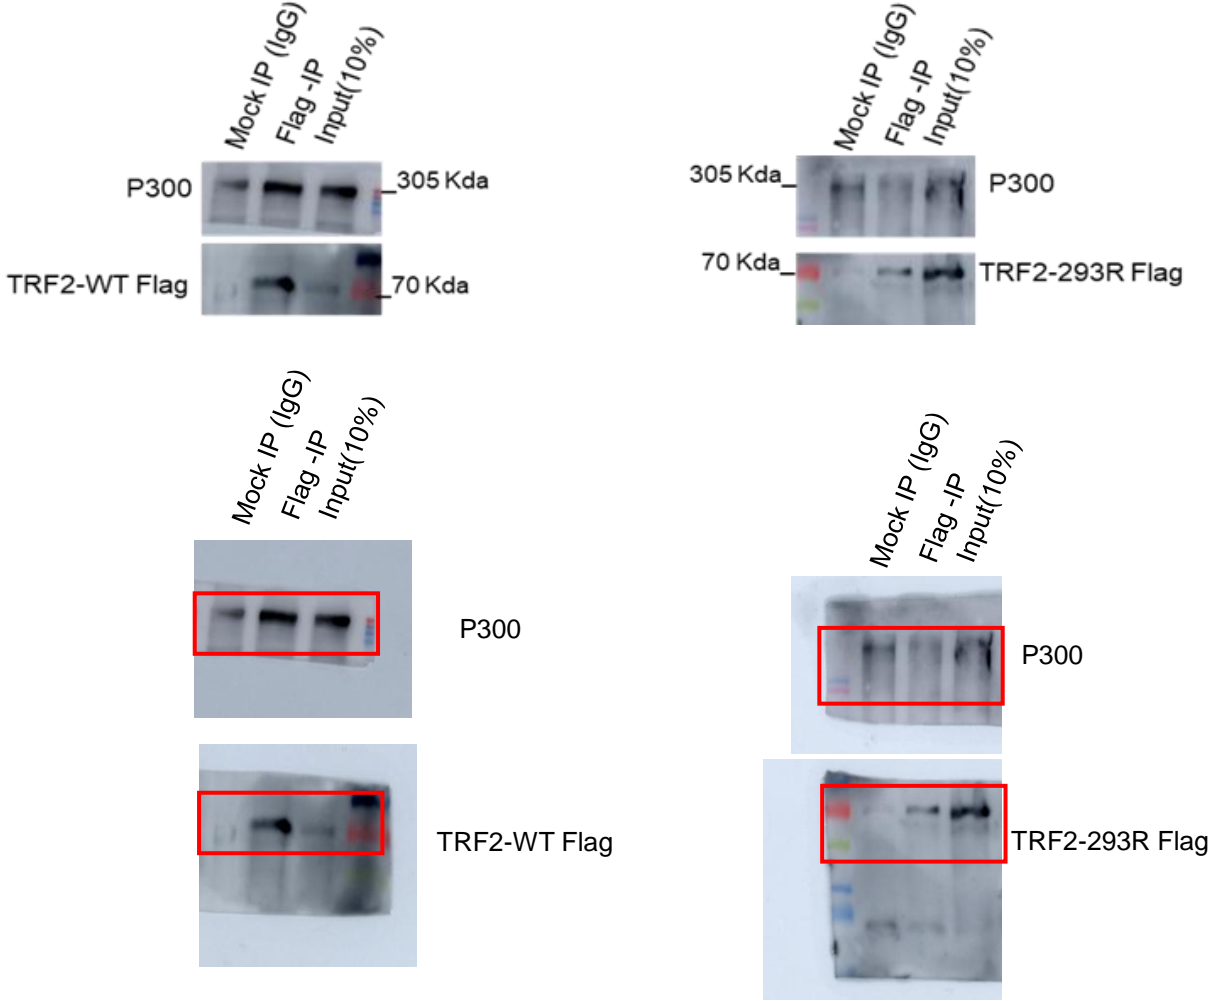

Supplement: fig5-figsupp1-data2 [file elife-95106-fig5-figsupp1-data2-v1.zip]

Figure 6- A-B

Figure

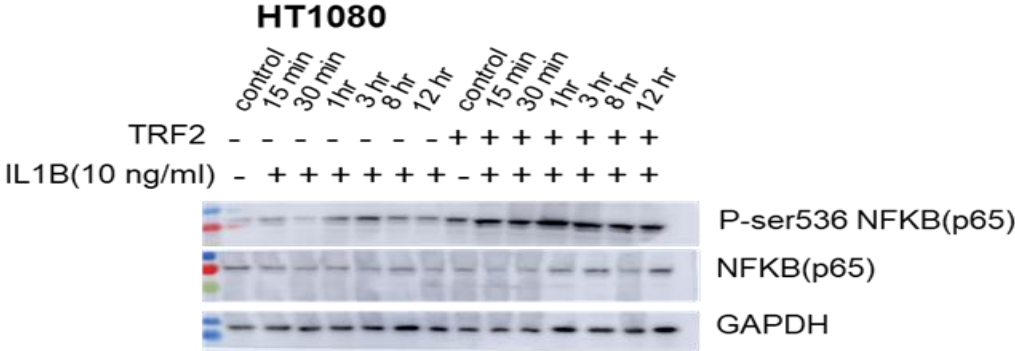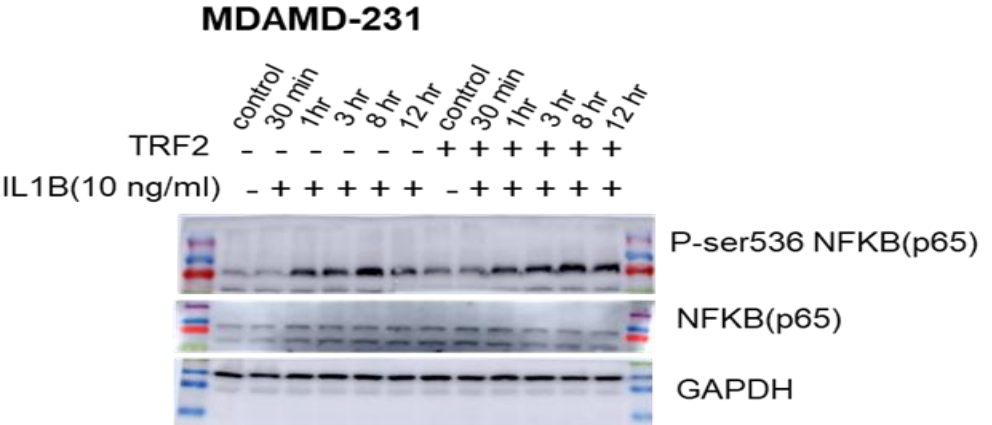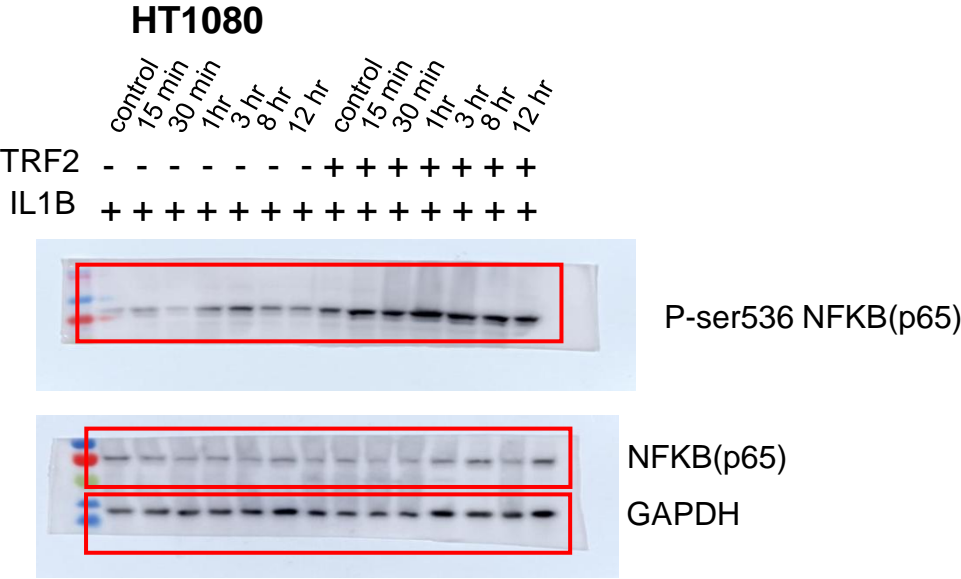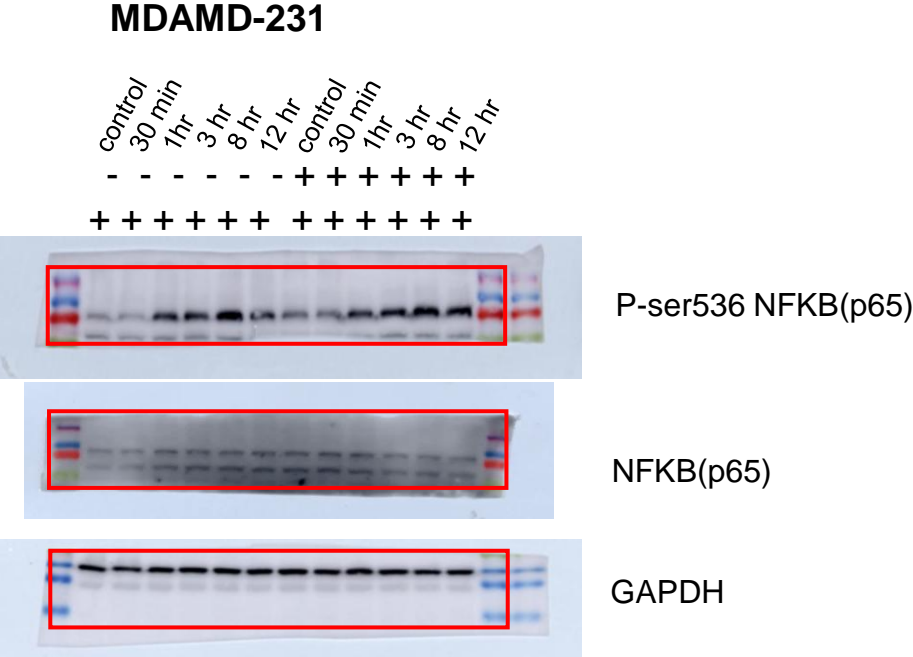

Supplement: fig6-data2 [file elife-95106-fig6-data2-v1.zip]

Figure 6-figure supplement 1 B

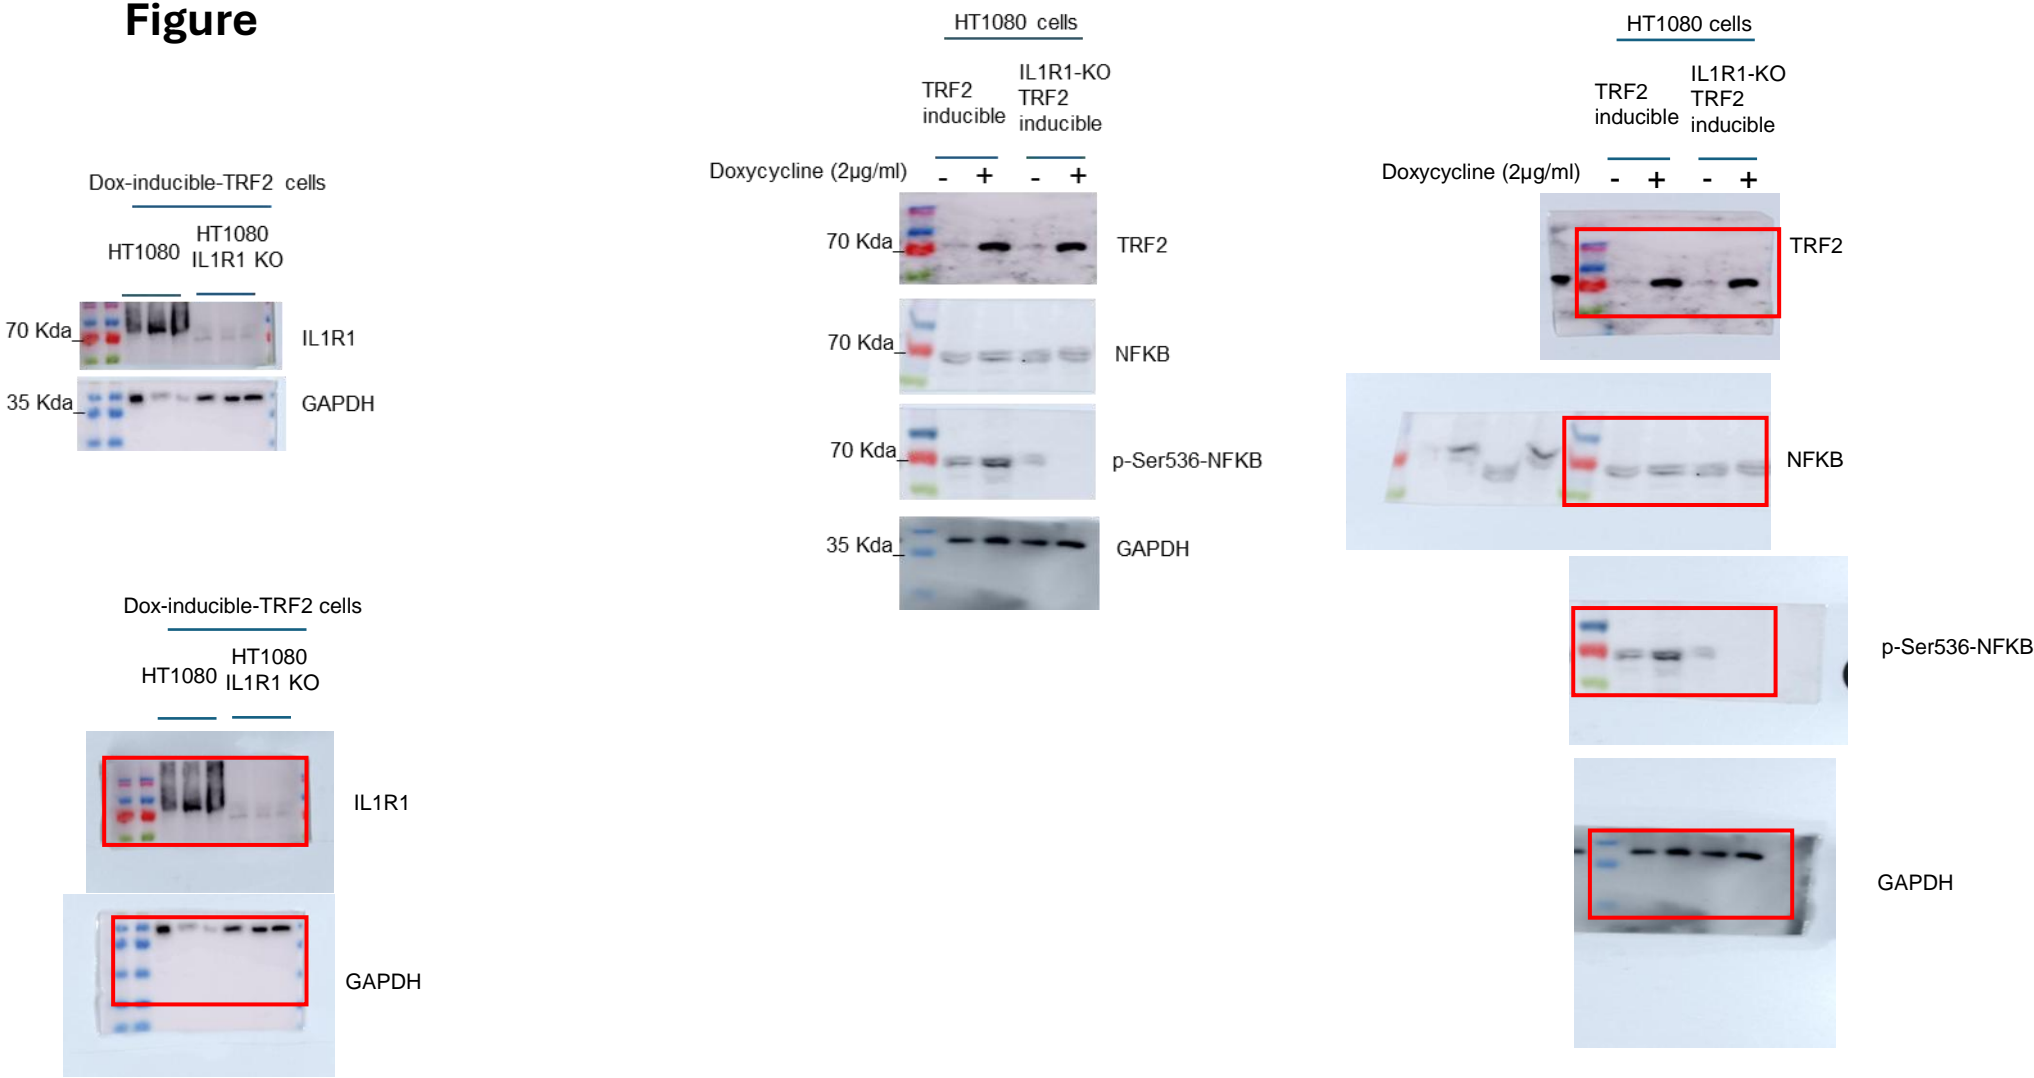

Figure 6-figure supplement 1 C

Figure

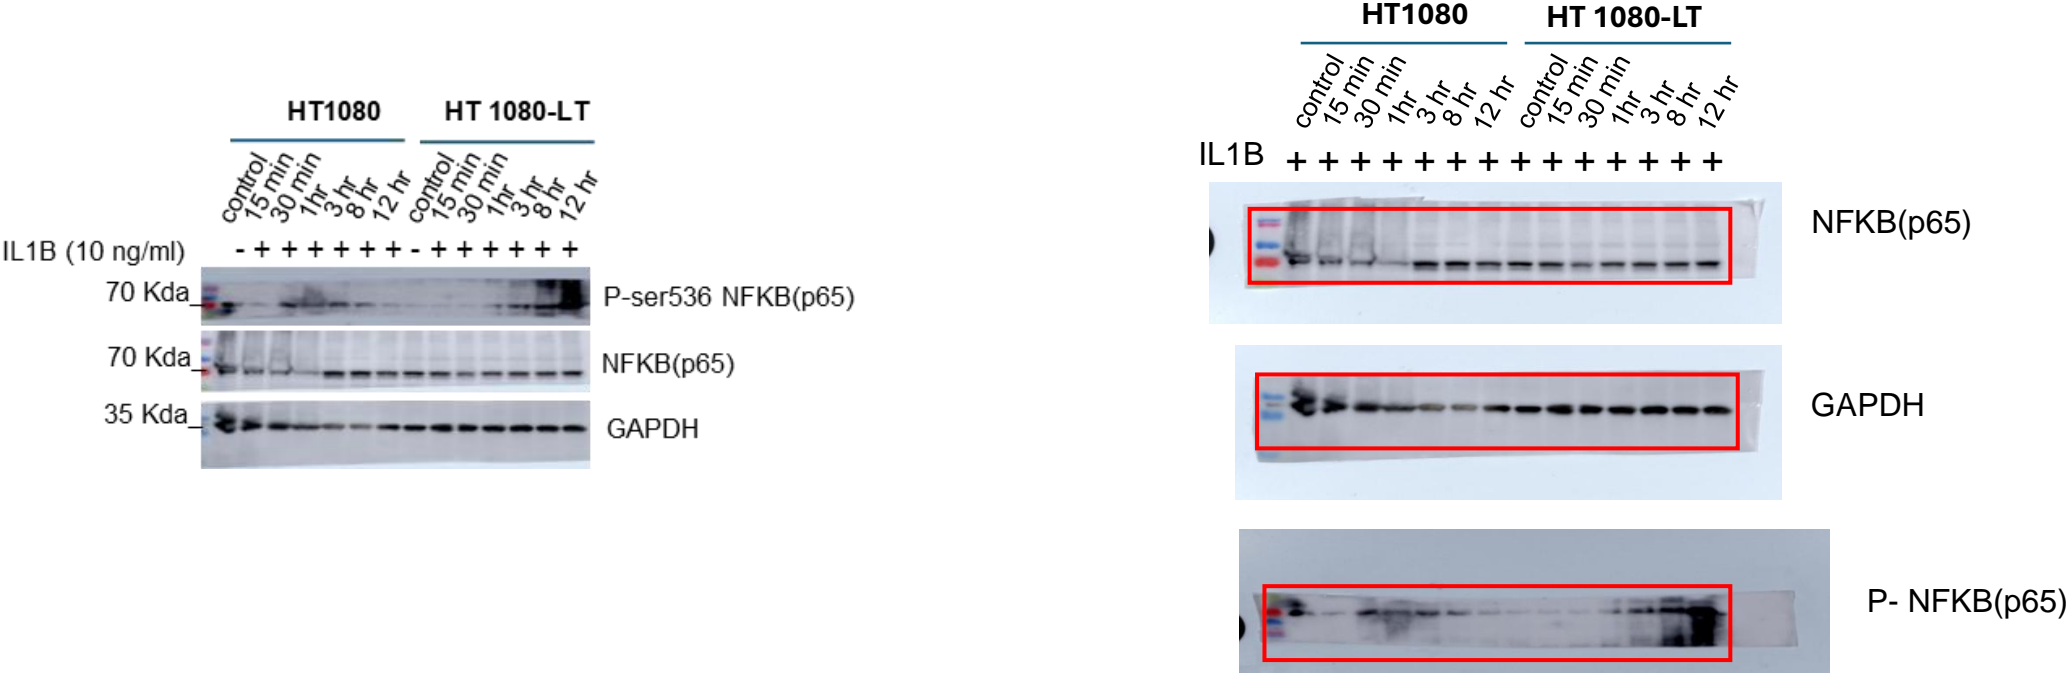

Supplement: fig6-figsupp1-data2 [file elife-95106-fig6-figsupp1-data2-v1.zip]
